# Supplementary material
Source: Royal Society of Chemistry journal article supplement (doi:10.1039/d6cc02263d)
Supplement: d6cc02263d1.pdf [file d6cc02263d1.pdf]

## Supplementary Information

### **A seeding strategy enables catalyst-free high-rate lithium–oxygen batteries**

Rongze Sun,<sup>‡a</sup> Wenjie Niu,<sup>‡a</sup> Ning Zhao,<sup>\*a</sup> Pengfei Yu,<sup>\*b</sup> and Xiangxin Guo<sup>\*a</sup>

a. College of Physics, Qingdao University, Qingdao 266071, China.

E-mail: n.zhao@qdu.edu.cn; xxguo@qdu.edu.cn

b. Center for Transformative Science, ShanghaiTech University, Shanghai 201210, China.

E-mail: yupf1@shanghaitech.edu.cn

‡ These authors contributed equally to this work.

## Experimental Section

The Vertically aligned carbon nanotube (VACNT) cathodes grown on stainless steel mesh were purchased from Microphase Co. LTD, Japan. The mass loading of the VACNTs was approximately  $2.0 \text{ mg cm}^{-2}$ , and the specific surface area was approximately  $80 \text{ m}^2 \text{ g}^{-1}$ .

Swagelok-type batteries were assembled in an argon-filled glovebox with oxygen and moisture levels maintained below 0.1 ppm. The battery components consisted of a lithium foil anode, a VACNT cathode, and a glass fiber separator (purchased from Whatman) impregnated with the electrolyte.

The morphological evolution of the cathodes after discharge at various oxygen pressures and current densities was examined using a scanning electron microscope (SEM, Hitachi S-4800, Japan). To investigate the microstructure of the seeding sites formed at the initial stage of discharge, spherical aberration-corrected high-resolution transmission electron microscopy (HR-TEM, JEOL JEM-2100F) was utilized. X-ray diffraction (XRD) analysis of the discharge products was performed using a Bruker D8 Discover diffractometer equipped with a Cu  $K\alpha$  radiation source.

Galvanostatic charge-discharge tests were conducted using a NEWARE battery testing system (CT-4008Tn). The Swagelok-type batteries were placed in a gas-controllable airtight chamber and tested at various current densities under different oxygen pressures. Electrochemical impedance spectroscopy (EIS) measurements were performed on a PARSTAT 3000A electrochemical workstation (Princeton Applied Research) within a frequency range from 100 kHz to 0.1 Hz.

## Computational details

All of the calculations are performed in the framework of the density functional theory with the projector augmented plane-wave method, as implemented in the Vienna ab initio simulation package (VASP)<sup>1,2</sup>. The generalized gradient approximation (GGA) proposed by Perdew, Burke, and Ernzerhof (PBE) is selected for the exchange-correlation potential<sup>3,4</sup>. The long-range van der Waals interaction is described by the

DFT-D3 approach<sup>5</sup>. The cut-off energy for plane wave is set to 520 eV. The energy criterion is set to  $10^{-4}$  eV in iterative solution of the Kohn-Sham equation. The Brillouin zone integrations for  $\text{Li}_2\text{O}_2$  (0 0 1),  $\text{Li}_2\text{O}_2$  (1 1 0),  $\text{Li}_2\text{O}_2$  (1 0 1),  $\text{Li}_2\text{O}_2$  (1 0 0), CNT, CNT- $\text{O}_2$  and CNT- $\text{Li}_2\text{O}_2$  are performed using  $3 \times 3 \times 1$ ,  $3 \times 2 \times 1$ ,  $3 \times 3 \times 1$  and  $3 \times 3 \times 1$  k-meshes, respectively. All the structures are relaxed until the residual forces on the atoms have declined to less than 0.05 eV/Å. Data analysis and visualization are carried out with the help of VASPKIT<sup>6</sup> code and VESTA<sup>7</sup>. To avoid interlaminar interactions, a vacuum spacing of 20 Å is applied perpendicular to the slab.

The surface energy can be defined by the equation:

$$E_{\text{surface}} = \frac{(E_{\text{slab}} - NE_{\text{bulk}})}{2A}$$

In the equation,  $E_{\text{slab}}$  is the total energy of the relaxed slab materials,  $E_{\text{bulk}}$  is the energy per unit formula of the bulk, N stands for  $E_{\text{slab}}$  multiple of  $E_{\text{bulk}}$ ,  $A_{\text{slab}}$  is the total area of slab materials.

Here, differences in Gibbs free energy ( $\Delta G$ ) for intermediates defined as:

$$\Delta G = \Delta E + \Delta E_{\text{ZPE}} - T\Delta S$$

where  $\Delta E$  is the total energy difference between the slab and respective terminations computed by DFT-PBE.  $\Delta E_{\text{ZPE}}$  and  $T\Delta S$  denotes differences in zero-point energy and entropy between adsorbed states of reaction intermediates and gap phase, respectively. T is the room temperature (298.15 K).

The adsorption energy  $E_{\text{ads}}$  is expressed as :

$$\Delta E_{\text{ads}} = E_{\text{A+B}} - E_{\text{A}} - E_{\text{B}}$$

where  $E_{\text{A+B}}$  is the total energy of slab A model with B adsorption,  $E_{\text{A}}$  is the energy of a A slab, and  $E_{\text{B}}$  is that for a B molecule.

## Supporting Figures

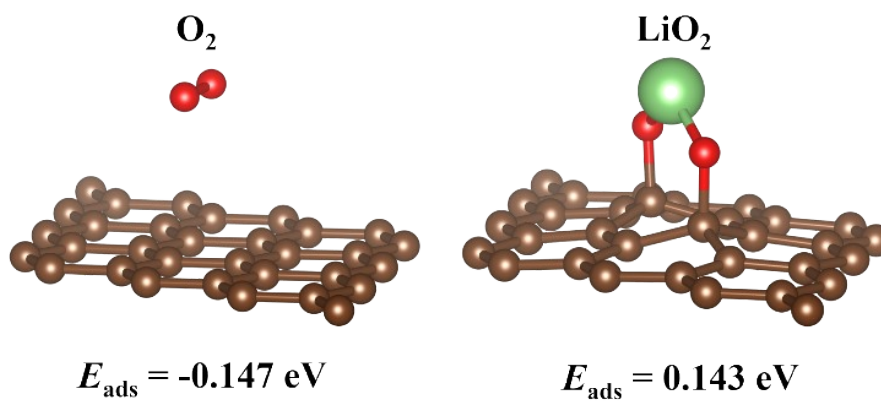

**Fig. S1** DFT optimized structure models and adsorption energies of  $O_2$  and  $LiO_2$  on VACNT surface under 1atm  $O_2$ .

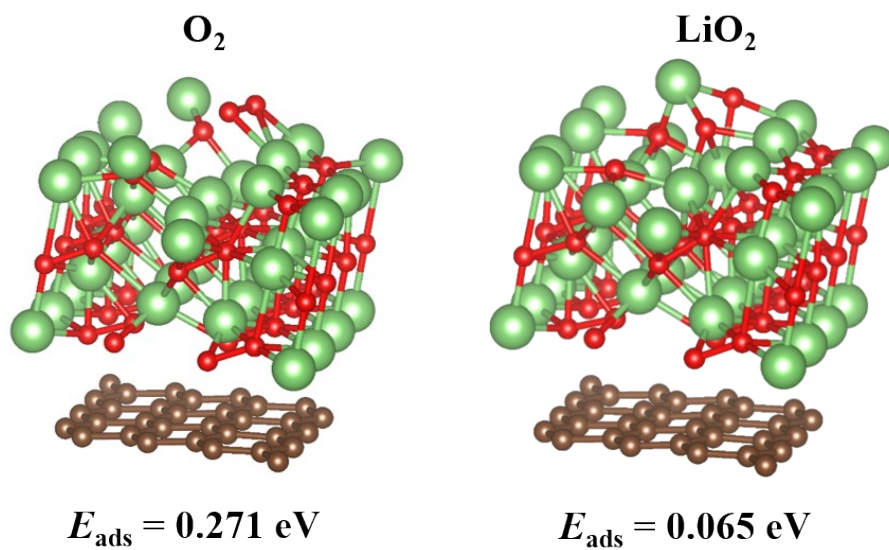

**Fig. S2** DFT optimized structure models and adsorption energies of O<sub>2</sub> and LiO<sub>2</sub> on VACNT-Li<sub>2</sub>O<sub>2</sub> surface under 1atm O<sub>2</sub>.

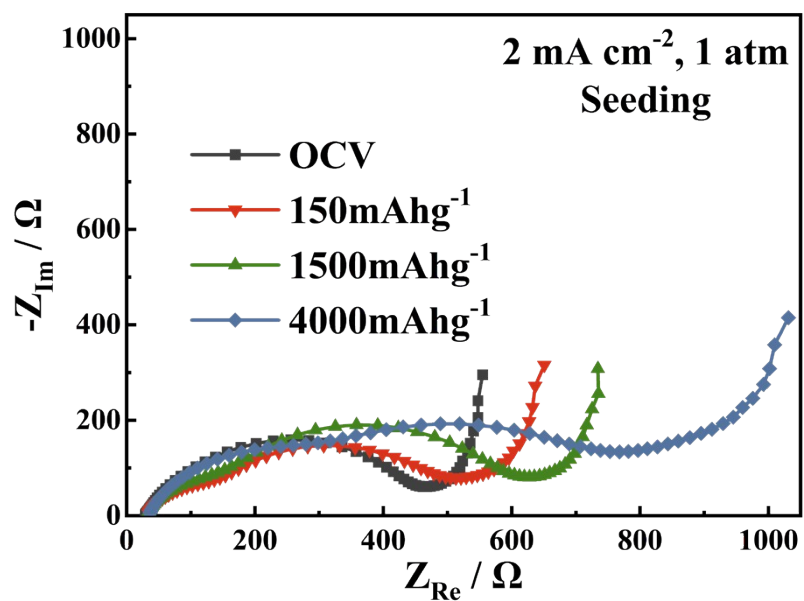

**Fig. S3** The electrochemical impedance spectroscopy (EIS) evolution of the seeded cathode during discharge at  $2 \text{ mA cm}^{-2}$ .

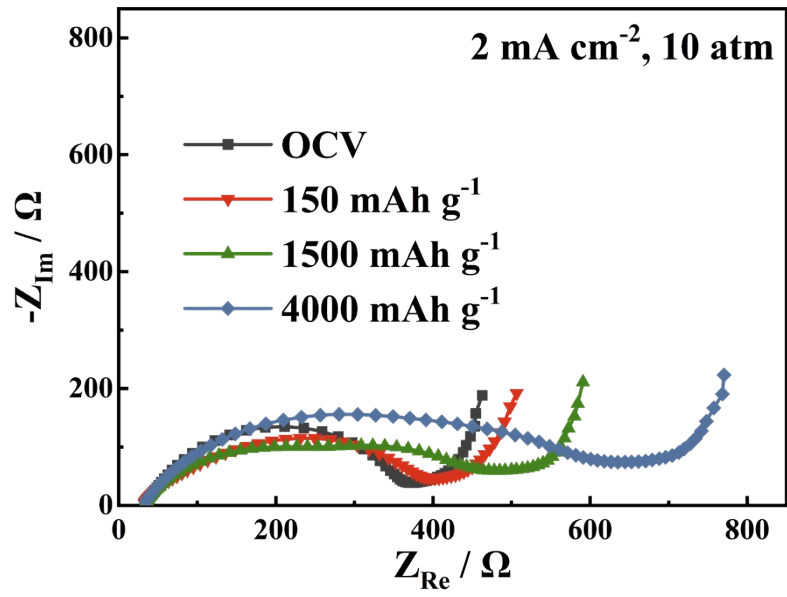

**Fig. S4** The EIS evolution at various discharge stages under 10 atm and 2 mA cm<sup>-2</sup>.

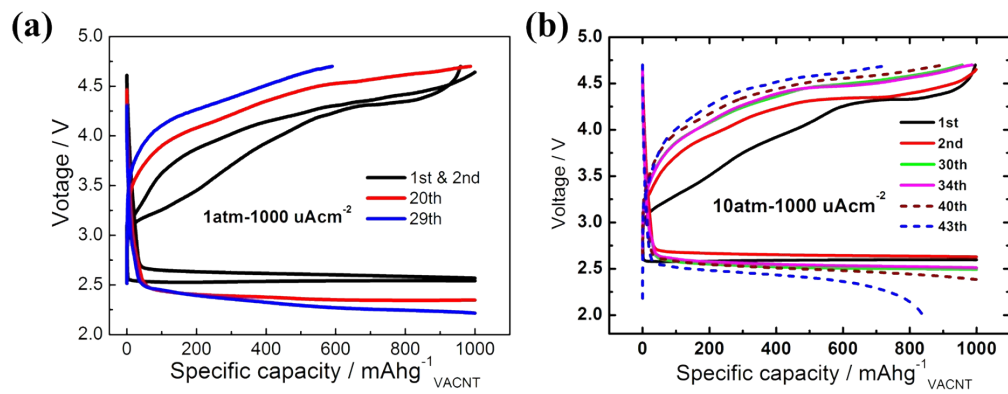

**Fig. S5** Cycling performance at 1atm and 10atm under a current density of 1.0 mA cm<sup>-2</sup> with a controlled discharge/charge depth of 1000 mAh g<sup>-1</sup>.

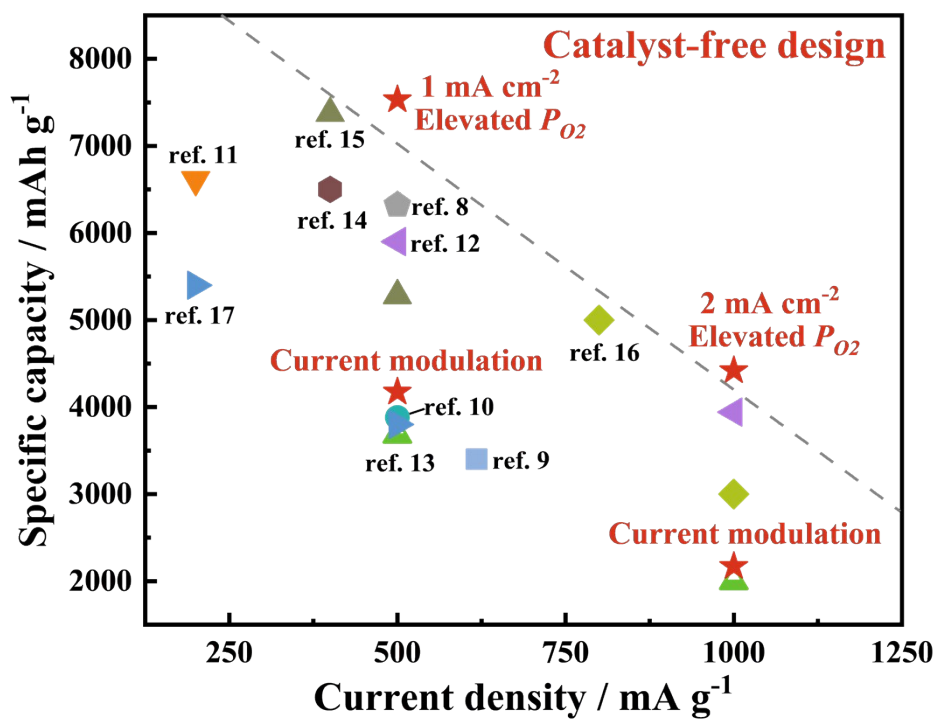

**Fig. S6** Comparative analysis of catalyst-based studies<sup>8-17</sup> and the present catalyst-free strategy on specific capacity under high current density.

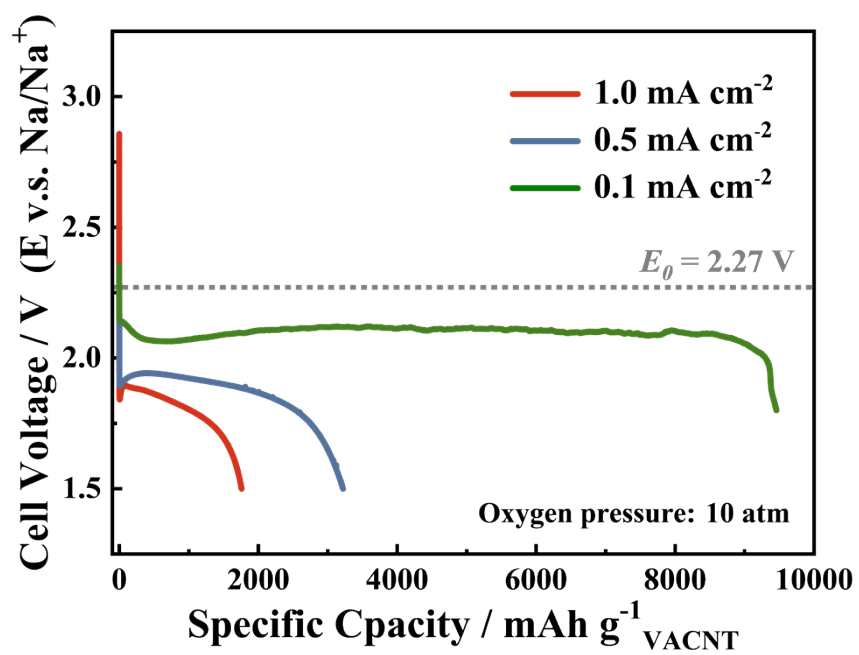

**Fig. S7** Discharge performance of the Na-O<sub>2</sub> battery at varying current densities under 10 atm O<sub>2</sub>.

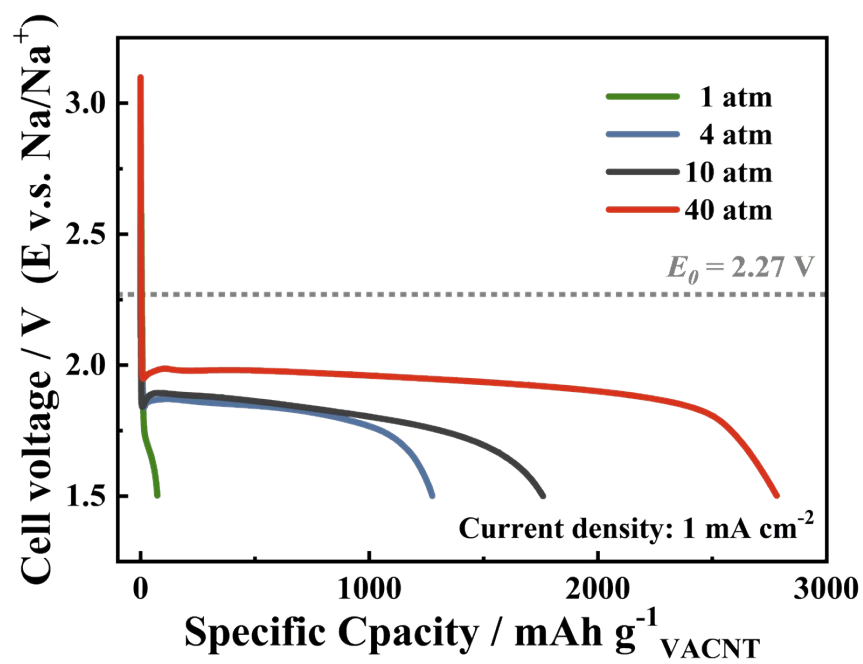

**Fig. S8** Oxygen pressure dependence of the discharge capacity for the Na-O<sub>2</sub> battery measured at 1 mA cm<sup>-2</sup>.

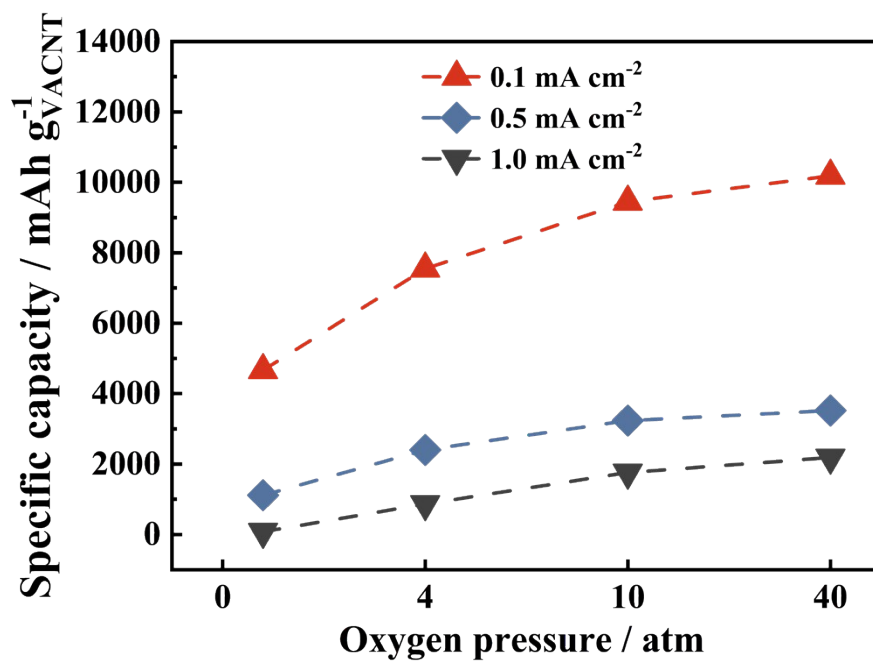

Fig. S9 Evolution of the discharge capacity in the Na-O<sub>2</sub> batteries under varying current densities and oxygen pressures.

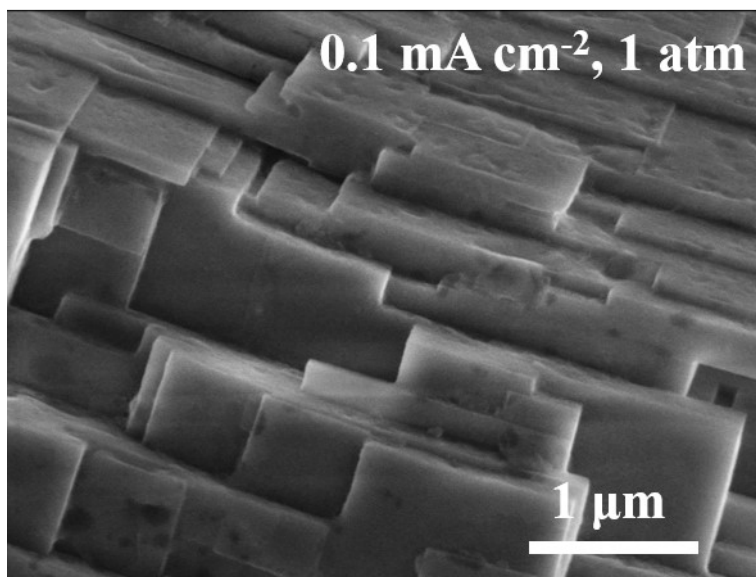

**Fig. S10** Morphology of the discharge products in the Na-O<sub>2</sub> battery at 1 atm O<sub>2</sub>.

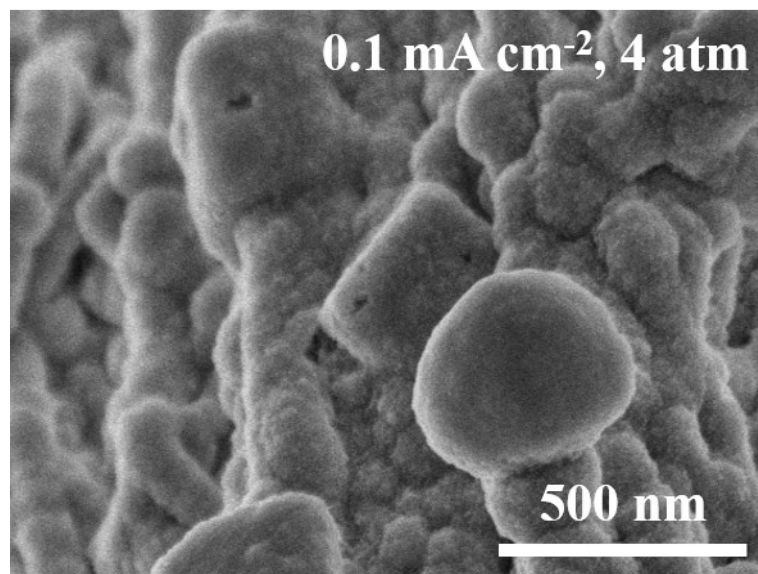

**Fig. S11** Morphology of the discharge products in the Na-O<sub>2</sub> battery at 4 atm O<sub>2</sub>.

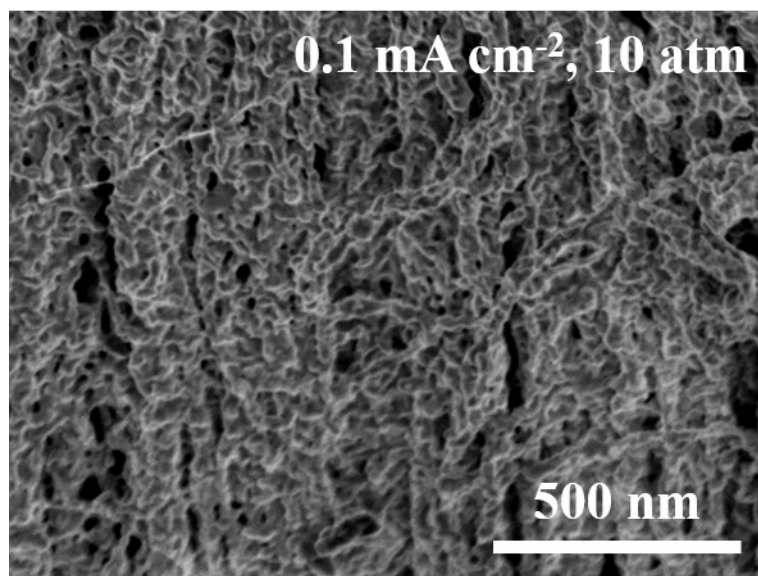

**Fig. S12** Morphology of the discharge products in the Na-O<sub>2</sub> battery at 10 atm O<sub>2</sub>.

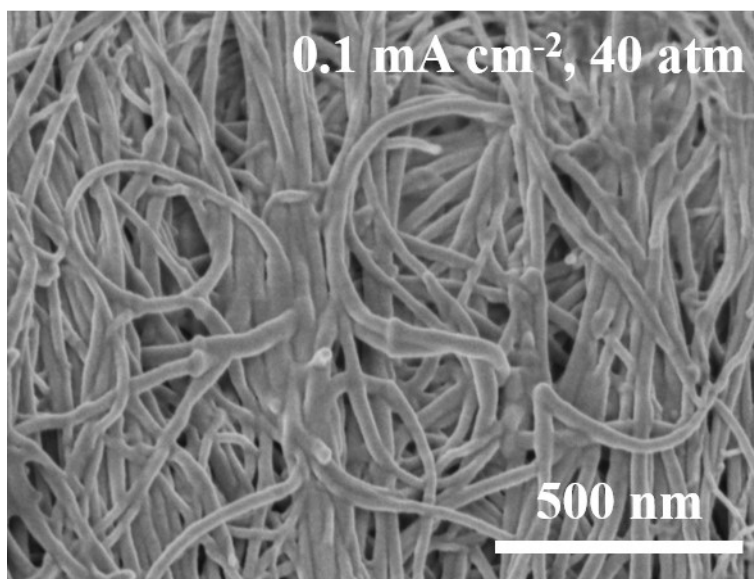

**Fig. S13** Morphology of the discharge products in the Na-O<sub>2</sub> battery at 40 atm O<sub>2</sub>.

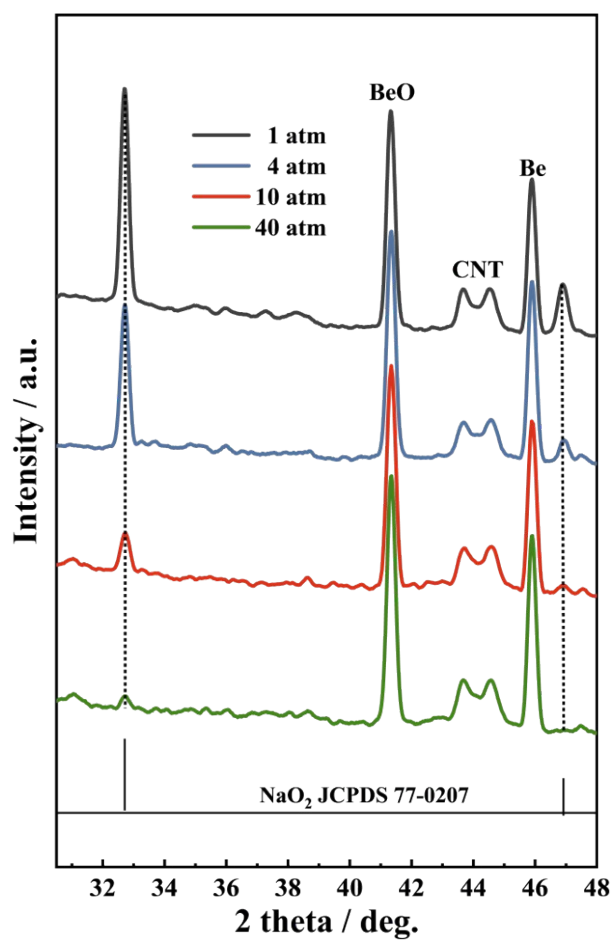

**Fig. S14** XRD patterns of the discharge products for the Na-O<sub>2</sub> battery under different oxygen pressures.

## References

- 1 Kresse, G. & Hafner, J. Ab initio molecular dynamics for open-shell transition metals. *Phys. Rev. B Condens. Matter*, 1993, **48**, 13115-13118.
- 2 Kresse, G. F. I., J. Efficient iterative schemes for ab initio total-energy calculations using a plane-wave basis set. *Phys. Rev. B Condens. Matter*, 1996, **54**, 169-185.
- 3 John P. Perdew, K. B., and Matthias Ernzerhof. Generalized gradient approximation made simple. *Phys. Rev. Lett*, 1996, **77**.
- 4 Kohn, W. & Sham, L. J. Self-Consistent Equations Including Exchange and Correlation Effects. *Phys. Rev.*, 1965, **140**, A1133-A1138.
- 5 Grimme, S., Antony, J., Ehrlich, S. & Krieg, H. A consistent and accurate ab initio parametrization of density functional dispersion correction (DFT-D) for the 94 elements H-Pu. *J. Chem. Phys.*, 2010, **132**, 154104.
- 6 Wang, V., Xu, N., Liu, J.-C., Tang, G. & Geng, W.-T. VASPKIT: A user-friendly interface facilitating high-throughput computing and analysis using VASP code. *Comput. Phys. Commun.*, 2021, **267**, 108033.
- 7 Momma, K. & Izumi, F. VESTA: a three-dimensional visualization system for electronic and structural analysis. *J. Appl. Crystallogr.*, 2008, **41**, 653-658.
- 8 Y. Wang, S. Ma, M. Li, H. Liu, B. Huo, K. Zeng and Z. Sun, *J. Cleaner Prod.*, 2026, **554**, 148144.
- 9 P. Zhang, S. Zhang, M. He, J. Lang, A. Ren, S. Xu and X. Yan, *Adv. Sci.*, 2017, **4**, 1700172.
- 10 Y. Yao, S. Wang, X. Ma, Y. Han, Z. Tong, G. Li, J. Feng, M. D. Khan, N. Revaprasadu, Q. Sun and Y. Tian, *Small*, 2025, **21**, 2503521.
- 11 P. Xia, H. Wu, H. Yuan, X. Yang, T. Xia, J. Ma, Y. Yuan and Y. Dong, *J. Energy Storage*, 2025, **133**, 118082.
- 12 R. Zhang, T. S. Zhao, M. Wu, P. Tan and H. Jiang, *Energy Technol.*, 2018, **6**, 263-272.
- 13 A. Hu, W. Lv, T. Lei, W. Chen, Y. Hu, C. Shu, X. Wang, L. Xue, J. Huang, X. Du, H. Wang, K. Tang, C. Gong, J. Zhu, W. He, J. Long and J. Xiong, *ACS Nano*, 2020, **14**, 3490-3499.
- 14 Y. Niu, Y. Feng, C. Su, C. Wu, S. Zhang, Z. Lu, W. Xia, R. Ma, M. Ma, K. Xia, H. Xue and H. Gong, *Chem. Eng. J.*, 2025, **525**, 170542.
- 15 Z. Zhou, B. Li, J. Li, K. Wang, J. Bi, S. He, X. Yu, W. Ai and W. Huang, *Adv. Mater.*, 2026, **38**, e72632.
- 16 S. Guan, W. Jia, Y. Gao, M. Liu, L. Wang, Y. Zhu and X. Li, *Angew. Chem., Int. Ed.*, 2026, **65**, e23729.
- 17 Y. Yao, S. Wang, X. Ma, Y. Han, Z. Tong, G. Li, J. Feng, M. D. Khan, N. Revaprasadu, Q. Sun and Y. Tian, *Small*, 2025, **21**, 2503521.
